# Supplementary material for: Tumor-suppressive function of UNC5D in papillary thyroid cancer
Source: PubMed Central journal article supplement (PMC5707086; doi:10.18632/oncotarget.21759), 2017-10-10
Supplement: oncotarget-08-96126-s001.pdf [file oncotarget-08-96126-s001.pdf]

# Tumor-suppressive function of *UNC5D* in papillary thyroid cancer

## SUPPLEMENTARY MATERIALS

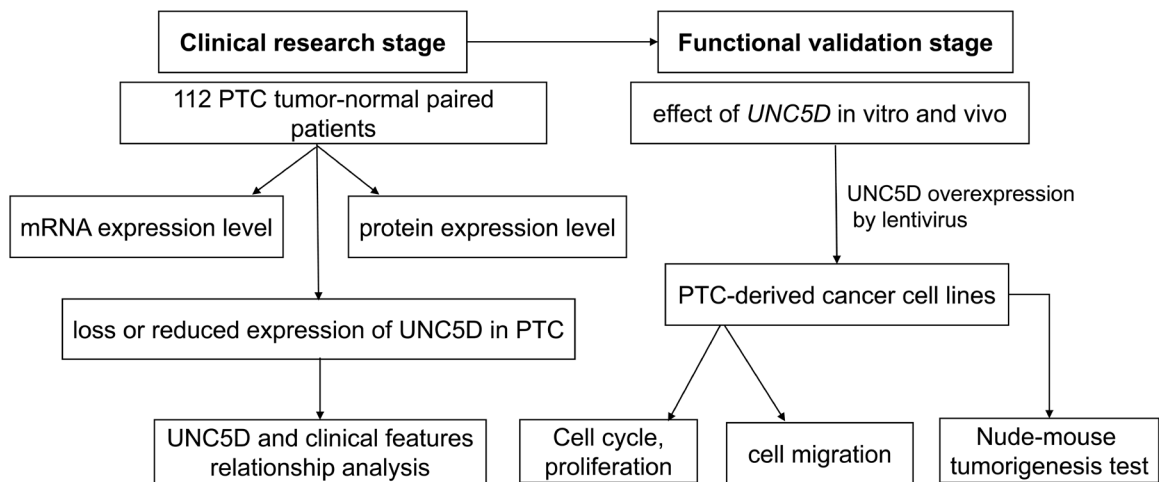

Supplementary Figure 1: A flowchart showing our study design.

**Supplementary Table 1: Demographic information for 112 PTC patient**

See Supplementary File 1
